# Supplementary material for: Highly oriented GeSe thin film: self-assembly growth via the sandwiching post-annealing treatment and its solar cell performance
Source: Royal Society of Chemistry journal article supplement (doi:10.1039/c8nr09836k), 2019-01-01
Supplement: c8nr09836k1.pdf [file c8nr09836k1.pdf]

## Supporting Information

### Highly Oriented GeSe Thin Film: Self-Assembly Growth via the Sandwiching Post-Annealing Treatment and Its Solar Cell Performance

Binwen Chen<sup>1,3</sup>, Yurong Ruan<sup>1,2</sup>, Jianmin Li<sup>4,\*</sup>, Weihuang Wang<sup>1,3</sup>, Xinlian Liu<sup>1</sup>,  
Huiling Cai<sup>1</sup>, Liquan Yao<sup>1</sup>, Jianmin Zhang<sup>1,2,\*</sup>, Shuiyuan Chen<sup>1,2,3</sup>, Guilin Chen<sup>1,2,3,\*</sup>.

1. Fujian Provincial Key Laboratory of Quantum Manipulation and New Energy  
Materials, College of Physics and Energy, Fujian Normal University, Fuzhou, 350117,

China

2. Fujian Provincial Engineering Technology Research Center of Solar Energy  
Conversion and Energy Storage, Fuzhou, 350117, China.

3. Fujian Provincial Collaborative Innovation Center for Optoelectronic  
Semiconductors and Efficient Devices, Xiamen, 361005, China

4. Department of Physics, The Chinese University of Hong Kong, Shatin, Hong  
Kong.

\*Corresponding author: Tel. +86 591 22867577

Email address: glchen@fjnu.edu.cn (G.L. Chen); jmzhang@fjnu.edu.cn (J.M. Zhang);  
b142916@cuhk.edu.hk (J.M. Li)

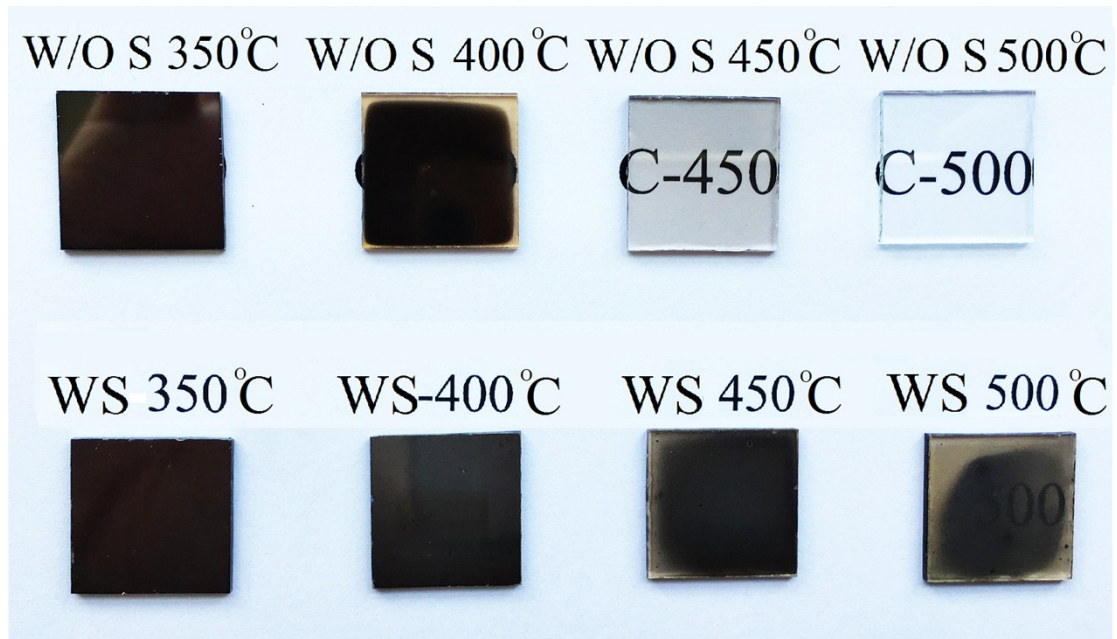

**Figure S1.** The photographs of GeSe samples annealed without sandwiching treatment and with sandwiching treatment at the temperatures of 350 °C ~ 500 °C.

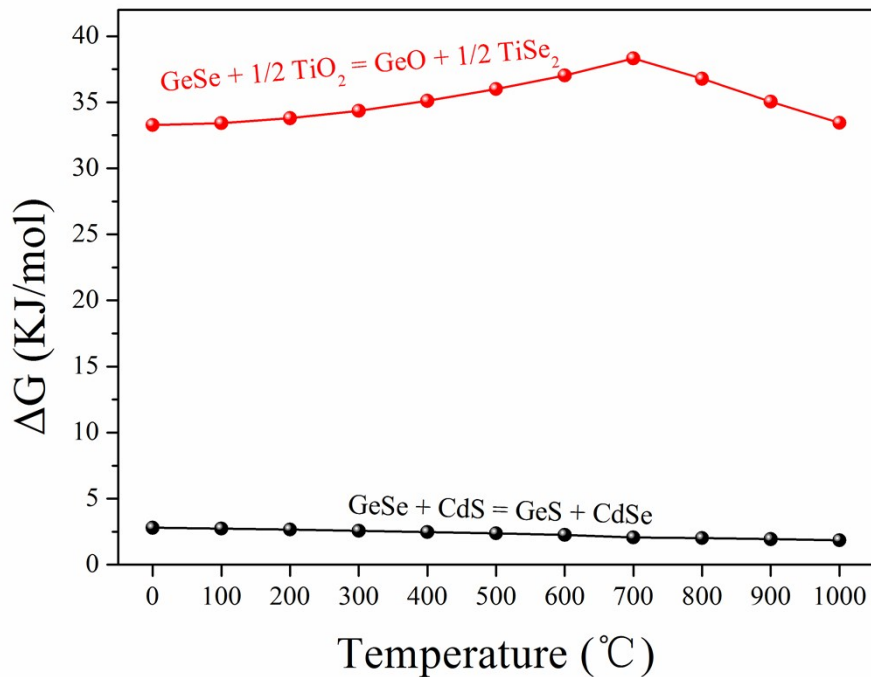

**Figure S2.** The Gibbs free energy ( $\Delta G$ ) of the possible interfacial reaction:  $\text{GeSe} + 1/2\text{TiO}_2 = \text{GeO} + 1/2\text{TiSe}$  and  $\text{GeSe} + \text{CdS} = \text{GeS} + \text{CdSe}$ . It can be easily found in the Figure S2 that the Gibbs free energy of GeSe/TiO<sub>2</sub> interface is always larger than the one of GeSe/TiO<sub>2</sub> interface over the range of temperatures 0 ~ 1000 °C, which indicates that TiO<sub>2</sub> is less likely to react with GeSe.

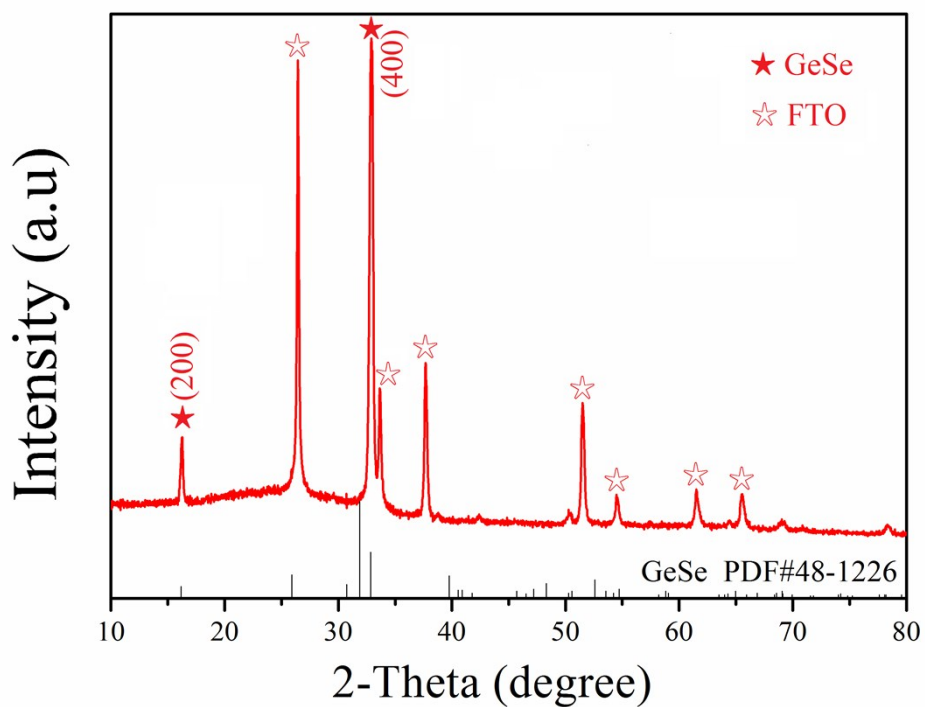

**Figure S3.** The XRD patterns of GeSe thin film deposited on FTO/TiO<sub>2</sub> and annealed with sandwiching treatment at the temperature of 450 °C. The XRD patterns of GeSe thin film also matched GeSe orthorhombic phase (JCPDS#48-1226) well. Similar to SLG substrate, the GeSe thin film deposited on FTO/TiO<sub>2</sub> also exhibited highly preferred orientations along the planes of (200) and (400).

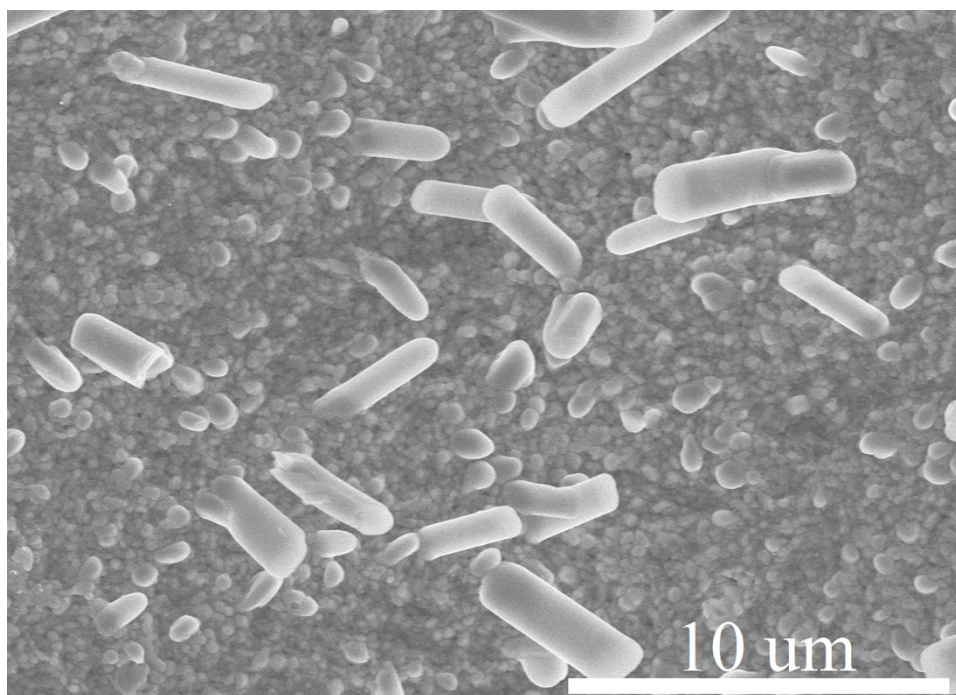

**Figure S4.** The SEM image of the GeSe film deposited on FTO/TiO<sub>2</sub> and annealed with sandwiching treatment at the temperature of 450 °C.
